# Supplementary material for: Sequence Diversity in the Dickeya fliC Gene: Phylogeny of the Dickeya Genus and TaqMan® PCR for 'D. solani', New Biovar 3 Variant on Potato in Europe
Source: PLoS One. 2012 May 3;7(5):e35738. doi: 10.1371/journal.pone.0035738 (PMC3343043; doi:10.1371/journal.pone.0035738)
Supplement: Table S1 — Reference strains of the recognized Dickeya taxa and ‘D. solani’, of Pectobacterium taxa and taxa of other phytopathogenic bacteria from potato, investigated in fliC phylogeny and fliC Taqman® real-time PCR. 1as identified in [1], [3] or [5] 2the strain in bold was used when different strain designations are displayed 3amplicon of the fliC locus with primers fliC-1 & fliC-2 [37]: ∼650 bp (+), multiple amplicons (+a), a larger amplicon of ∼900 bp (+b) or no amplicon (−) 4 Dickeya clades identified on the basis of global alignment of 621 bp fliC amplicon [37], except for D.dieffenbachiae which is identified on the basis of global alignment of 353 bp fliC amplicon [38] 5 fliC sequevar or sequence variant [9]: strains/isolates with >1% sequence variation in the 621 bp fragment. D. dieffenbachiae and D. paradisiaca are not considered in this classification 6negative result = no Ct LMG = Laboratory of Microbiology, Ghent University, Belgium NCPPB = National Collection of Plant Pathogenic Bacteria, York, UK CFBP = Collection Française des Bactéries Phytopathogènes, Angers France IPO/PRI = Plant Research International, Wageningen, The Netherlands (XLS) [file pone.0035738.s001.xls]

## Sheet: Table S1. fliC ref strains
Table S1. Reference strains of the six recognized Dickeya taxa and 'Dickeya solani', of Pectobacterium taxa and taxa of other phytopathogenic bacteria from potato, investigated in fliC phylogeny and fliC Taqman® real-time PCR.
genomic species 1	strain designations 2	biological origin	geographical origin	year of isolation	biovar	fliC amplicon3	fliC genomic clade4	sequevar5	fliC TaqMan® PCR6
Dickeya dianthicola (8)	LMG 2485T, CFBP 1200T, NCPPB 453T	Dianthus caryophyllus	UK	1956	1	+	D. dianthicola	1	-
	LMG 25729, CFBP 1276, NCPPB 1385	Dahlia sp.	Romania	1962	7	+	D. dianthicola	1	-
	LMG 25730, CFBP 1888, NCPPB 3344	Solanum tuberosum	France	1978		+	D. dianthicola	1	-
	LMG 25731, CFBP 2015, NCPPB 3345	Solanum tuberosum	France	1975		+	D. dianthicola	1	-
	NCPPB 3530	Solanum tuberosum	UK (Jersey)	1987	7	+	D. dianthicola	1	-
	NCPPB 3528	Solanum tuberosum	UK (Jersey)	1987	1	+	D. dianthicola	1	-
	IPO 982	Solanum tuberosum cv. Irene	The Netherlands	1991	1	+	D. dianthicola	1	-
	PRI 980	Solanum tuberosum cv. Arkula	The Netherlands	1991	7	+	D. dianthicola	1	-
Dickeya dadantii (5)	NCPPB 3537	Solanum tuberosum	Peru	1987	3	+	D. dadantii	3	-
	LMG 2534, CFBP 4177, NCPPB 2477	Musa paradisiaca	Jamaica	1970	3	+	D. dadantii	3	-
	CFBP 3855	Saintpaulia ionantha	France	1977	3	+	D. dadantii	3	-
	LMG 25991T, CFBP 1269T, NCPPB 898T	Pelargonium capitatum	Comoro Islands	1960	3	+	D. dadantii	3	-
	CFBP 3697	Ipomoea batatas	Cuba	1987	3	+	D. dadantii	3	-
Dickeya dieffenbachiae (6)	CFBP 1360	Dieffenbachia sp.	France	1970	2	+a	D. dieffenbachiae		-
	LMG 2475, CFBP 1238, NCPPB 1157	Dieffenbachia picta	USA	1959	2	+a	D. dieffenbachiae		-
	LMG 2477, CFBP 1237, NCPPB 1514	Dieffenbachia picta	Germany	1962	2	+a	D. dieffenbachiae		-
	LMG 25992T, CFBP 2051T, NCPPB 2976T	Dieffenbachia sp.	USA	1957	2	+a	D. dieffenbachiae		-
	LMG 2479, CFBP 1345, NCPPB 2308	Dieffenbachia sp.	Italy	1969	2	+a	D. dieffenbachiae		-
	PRI 1259	Solanum tuberosum	Hungary		2	+a	D. dieffenbachiae		-
Dickeya chrysanthemi (8)	LMG 2804T, CFBP 2048T, NCPPB 402T	Chrysanthemum morifolium	USA	1956	5	+	D. chrysanthemi	7	-
	LMG 2490, CFBP 1348, NCPPB 2309	Chrysanthemum morifolium	Italy	1969	5	+	D. chrysanthemi	7	-
	LMG 2522, NCPPB 2227	Chrysanthemum morifolium	UK	1969	5	+	D. chrysanthemi	7	-
	LMG 2524, NCPPB 2149	Euphorbia pulcherrima	UK	1968	5	+	D. chrysanthemi	7	-
	NCPPB 3533, IPO 655	Solanum tuberosum	USA		5	+	D. chrysanthemi (parthenii lineage)	10	-
	CFBP 3703	Helianthus annuus	France	1986	5	+	D. chrysanthemi	7	-
	NCPPB 2899	Daucus carota var. sativus	USA	1975	5	+	D. chrysanthemi	8	-
	NCPPB 1861, CFBP 1236	Partenium argentatum	USA	1945	6	+	D. chrysanthemi (parthenii lineage)	9	-
'Dickeya solani' (8)	PRI 2222, LMG 25993	Solanum tuberosum	The Netherlands		3	+	'D. solani'	2	+
	PRI 2187	Solanum tuberosum cv. Sapphire	Israel	2006	3	+	'D. solani'	2	+
	PRI 2276	Solanum tuberosum cv. Santé	Poland	2005	3	+	'D. solani'	2	+
	PRI 3294	Solanum tuberosum	Finland		3	+	'D. solani'	2	+
	PRI 3295	Solanum tuberosum	Finland		3	+	'D. solani'	2	+
	PRI 3336	Solanum tuberosum	France		3	+	'D. solani'	2	+
	PRI 3337	Solanum tuberosum	France		3	+	'D. solani'	2	+
	PRI 2019, LMG 25990	Hyacinthus orientalis	The Netherlands		3	+	'D. solani'	2	+
Dickeya zeae (8)	LMG 2505T, CFBP 2052T, NCPPB 2538T	Zea mays	USA	1970	3	+	D. zeae P1	4	-
	LMG 2497, CFBP 1277, NCPPB 1863	Zea mays	USA	1966	3	+	D. zeae detached lineage	6	-
	LMG 2533, CFBP 4176, NCPPB 2339	Chrysanthemum morifolium	UK	1970	3	+	D. zeae P1	4	-
	LMG 2539, CFBP 1447, NCPPB 2546	Zea mays	India	1969	3	+	D. zeae P2	5	-
	CFBP 6466	Ananas comosus	Martinique	1991	3	+	D. zeae P1	4	-
	NCPPB 3531, IPO 645	Solanum tuberosum	Australia		3	+	D. zeae P2	5	-
	NCPPB 3193	Brassica chinensis	Malaysia	1978	3	+	D. zeae P2	5	-
	LMG 2531, CFBP 1278, NCPPB 1121	Ananas comosus	Malaysia	1961	3	+	D. zeae P2	5	-
Dickeya paradisiaca (3)	LMG 2543, NCPPB 2512	Musa paradisiaca var. dominico	Colombia	1970	4	+b			-
	LMG 2544, NCPPB 2513	Musa paradisiaca var. dominico	Colombia	1970	4	+b			-
	LMG 6250, CFBP 3477	Musa paradisiaca (plantain)	Colombia	1968	4	+b			-
Pectobacterium atrosepticum	LMG 2386T, CFBP 1526T, NCPPB 549T	Solanum tuberosum	UK (Scotland)	1957		+	Pectobacterium sp.		-
Pectobacterium carotovorum subsp. carotovorum	LMG 2404T, CFBP 2046T, NCPPB 312T	Solanum tuberosum	Denmark	1952		-			-
Pectobacterium carotovorum subsp. brasiliensis	CFBP 6617T, LMG 21371T	Solanum tuberosum cv. Elvira	Brazil	1999		+	Pectobacterium sp.		-
Pectobacterium carotovorum subsp. odoriferum	CFBP 5388	Solanum tuberosum cv. Diamant	Algeria	1997		+	Pectobacterium sp.		-
Pectobacterium betavasculorum	LMG 2398, CFBP 3291, NCPPB 1449	Solanum tuberosum	Romania	1968		+	Pectobacterium sp.		-
Pectobacterium wasabiae	LMG 8444T, CFBP 3304T, NCPPB 3701T	Eutrema wasabi	Japan	1985		-			-
Clavibacter michiganensis subsp. sepedonicus	LMG 2889T, CFBP 2049T, NCPPB 2137T	Solanum tuberosum	Canada	1968		-			-
Ralstonia solanacearum race 3	LMG 9576	Solanum tuberosum cv. Ottena	Belgium	1989		-			-
Paenibacillus macerans	LMG 13286	Solanum tuberosum	UK	1978		-			-
1 as identified in [1], [3] or [5].
2 the strain in bold was used when different strain designations are displayed.
3 amplicon of the fliC locus with primers fliC-1 & fliC-2 [37]: ~650 bp (+), multiple amplicons (+a), a larger amplicon of ~900 bp (+b) or no amplicon (-).
4 Dickeya clades identified on the basis of global alignment of 621 bp fliC fragment, except for D. dieffenbachiae which is identified on the basis of global alignment of 353 bp fliC fragment with fliC-for & fliC-rev primers [38].
5 fliC sequevar or sequence variant [9]: strains/isolates with > 1% sequence variation in the 621 bp fragment. D. dieffenbachiae is not considered in this classification.
6 negative result = no CT
LMG = Laboratory of Microbiology, Ghent University, Belgium
NCPPB = National Collection of Plant Pathogenic Bacteria, York, UK
CFBP = Collection Française des Bactéries Phytopathogènes, Angers France
IPO/PRI = Plant Research International, Wageningen, The Netherlands
