# Supplementary material for: Sequence Diversity in the Dickeya fliC Gene: Phylogeny of the Dickeya Genus and TaqMan® PCR for 'D. solani', New Biovar 3 Variant on Potato in Europe
Source: PLoS One. 2012 May 3;7(5):e35738. doi: 10.1371/journal.pone.0035738 (PMC3343043; doi:10.1371/journal.pone.0035738)
Supplement: Table S2 — Isolates of Dickeya and Pectobacterium from diagnostic samples investigated in fliC phylogeny and fliC Taqman® real-time PCR.1the strain in bold was used when different strain designations are displayed 2amplicon of the fliC locus with primers fliC-1 & fliC-2 [37]: ∼650 bp (+), multiple amplicons (+a), a larger amplicon of ∼900 bp (+b) or no amplicon (−) 3 Dickeya clades identified on the basis of global alignment of 621 bp fliC amplicon [37], except for D. dieffenbachiae which is identified on the basis of global alignment of 353 bp fliC amplicon [38] 4 fliC sequevar or sequence variant [9]: strains/isolates with >1% sequence variation in the 621 bp fragment. D. dieffenbachiae and D. paradisiaca are not considered in this classification 5negative result = no Ct GBBC = Culture collection of ILVO Diagnostic Centre for Plants (DCP) LMG = Laboratory of Microbiology, Ghent University, Belgium NCPPB = National Collection of Plant Pathogenic Bacteria, York, UK IPO = Plant Research International, Wageningen, The Netherlands (XLS) [file pone.0035738.s002.xls]

## Sheet: Table S2. fliC diagn isolates
Table S2. Isolates of Dickeya and Pectobacterium from diagnostic samples, investigated in fliC phylogeny and fliC Taqman® real-time PCR.
Species	isolate or strain designation 1	biological origin	geographical origin	year of isolation	biovar	fliC amplicon2	fliC genomic clade 3	sequevar4	fliC TaqMan® PCR6
Dickeya spp. (38)	GBBC 322	Solanum tuberosum cv. Ellis	Belgium	1993		+	D. dianthicola	1	-
	GBBC 323	Ludisia tricolor	Belgium	1998	3	+	unassigned Dickeya lineage 3	13	-
	GBBC 353	Dieffenbachia sp.	Belgium	1999	2	+a	D. dieffenbachiae		-
	GBBC 487	Solanum tuberosum cv. Anosta	Belgium	2003		+	D. dianthicola	1	-
	GBBC 2039, LMG 25864	Solanum tuberosum cv. Première	Belgium	2004		+	D. dianthicola	1	-
	GBBC 491	Solanum tuberosum cv. Spunta	Belgium	2004		+	D. dianthicola	1	-
	GBBC 500	Solanum tuberosum cv. Bintje	Belgium	2005	3	+	'D. solani'	2	+
	GBBC 2040, LMG 25615	Solanum tuberosum cv. Première	Belgium	2007	3	+	'D. solani'	2	+
	GBBC 1016	Solanum tuberosum cv. Lady Rosetta	Belgium	2008		+	D. dianthicola	1	-
	GBBC 1021	Solanum tuberosum cv. Victoria	France	2008	3	+	'D. solani'	2	+
	GBBC 1030	Solanum tuberosum cv. Lady Claire	Belgium	2008		+	D. dianthicola	1	-
	GBBC 1040	Solanum tuberosum cv. Kennebec	Belgium	2008		+	D. dianthicola	1	-
	GBBC 1045	Solanum tuberosum cv. Jaerla	Belgium	2008	3	+	'D. solani'	2	+
	GBBC 1047	Solanum tuberosum cv. Spunta	Belgium	2008	3	+	'D. solani'	2	+
	GBBC 1058, LMG 25614	Zea mays	Belgium	2005	3	+	D. zeae P2	16	-
	GBBC 1641	Solanum tuberosum cv. Paramount	Belgium	2009	3	+	'D. solani'	2	+
	GBBC 2007, LMG 24426	Lactuca sativa	Belgium	2005	3	+	unassigned Dickeya lineage 6	18	-
	LMG 2918	Phalaenopsis sp.	Germany		3	+	unassigned Dickeya lineage 1	11	-
	PD 471	Philodendron erubescens cv Emerald King	The Netherlands	1984	3	+	unassigned Dickeya lineage 2	12	-
	PD 487	Philodendron erubescens cv Emerald King	The Netherlands	1984	3	+	unassigned Dickeya lineage 2	12	-
	PD 550	Scindapsus pictus	The Netherlands	1985	3	+	unassigned Dickeya lineage 3	13	-
	PD 551	Kalanchoe blossfeldiana 'Pollux'	The Netherlands	1985	7	+	D. dianthicola	1	-
	PD 682	Cichorium intybus	The Netherlands	1987		+	D. dianthicola	1	-
	PD 813	Phalaenopsis	The Netherlands	1987	3	+	unassigned Dickeya lineage 4	15	-
	PD 916	Packera sp.	Taiwan	1987	3	+	D. dadantii	3	-
	PD 1084	Ctenanthe lubbersii	South Africa	1988	3	+	D. zeae P1	4	-
	PD 1268	Aglaonema sp.	The Netherlands	1989	3	+	unassigned Dickeya lineage 2	12	-
	PD 1464	Freesia cv Oberon	The Netherlands	1989	3	+	unassigned Dickeya lineage 5	17	-
	PD 1680	Euphorbia milii	The Netherlands	1990	3	+	D. dadantii	3	-
	PD 1934	Saintpaulia cv Lord	The Netherlands		3	+	D. dadantii	3	-
	PD 3786	Oncidium sp.	The Netherlands		3	+	unassigned Dickeya lineage 3	14	-
	PD 4073	Solanum tuberosum	Italy		3	+	'D. solani'	2	+
	PD 4338	Narcissus cv. Golden Bells	The Netherlands		3	+	D. dadantii	3	-
	IPO 807	Solanum tuberosum	The Netherlands			+	D. dianthicola	1	-
	IPO 982	Solanum tuberosum cv. Irene	The Netherlands	1991	1	+	D. dianthicola	1	-
	IPO 990	Solanum tuberosum	The Netherlands			+	D. dianthicola	1	-
	IPO 993	Solanum tuberosum	The Netherlands			+a	D. dieffenbachiae		-
Pectobacterium spp. (12)	GBBC 352	Aglaonema sp.	Belgium	1999		+	Pectobacterium sp.		-
	GBBC 428	Capsicum annuum	Belgium	2002		+	Pectobacterium sp.		-
	GBBC 1356	Brassica oleracea convar. capitata var. rubra	Belgium	2005		+	Pectobacterium sp.		-
	GBBC 1357	Solanum tuberosum	Cyprus	2006		-			-
	GBBC 1358	Solanum tuberosum	Belgium	2007		-			-
	GBBC 1359	Solanum tuberosum	Belgium	2007		-			-
	IPO 1371	Solanum tuberosum	The Netherlands			+	Pectobacterium sp.		-
	IPO 1602	Solanum tuberosum	The Netherlands			+	Pectobacterium sp.		-
	IPO 139	Solanum tuberosum	The Netherlands			-			-
	IPO 163	Solanum tuberosum	The Netherlands			+	Pectobacterium sp.		-
	IPO 1071	Solanum tuberosum	The Netherlands			+	Pectobacterium sp.		-
	IPO 1066	Solanum tuberosum	The Netherlands			+	Pectobacterium sp.		-
1 the strain in bold was used when different strain designations are displayed.
2 amplicon of the fliC locus with primers fliC-1 & fliC-2 [37]: ~650 bp (+), multiple amplicons (+a) or no amplicon (-).
3 Dickeya clade identified on the basis of global alignment of a 621 bp fliC fragment, except for D. dieffenbachiae which is identified on the basis of global alignment of a 353 bp fliC fragment with fliC-for & fliC-rev primers [38].
4 fliC sequevar [9]: strains/isolates with > 1% sequence variation in the 621 bp fragment. D. dieffenbachiae is not considered in this classification.
5 negative result = no CT
GBBC = Culture Collection of ILVO Diagnostic Centre for Plants (DCP)
LMG = Laboratory of Microbiology, Ghent University, Belgium
PD = Plant Protection Service, Wageningen, The Netherlands
IPO = Plant Research International, Wageningen, The Netherlands
