# Supplementary material for: Sequence Diversity in the Dickeya fliC Gene: Phylogeny of the Dickeya Genus and TaqMan® PCR for 'D. solani', New Biovar 3 Variant on Potato in Europe
Source: PLoS One. 2012 May 3;7(5):e35738. doi: 10.1371/journal.pone.0035738 (PMC3343043; doi:10.1371/journal.pone.0035738)
Supplement: Table S3 — Dickeya fliC sequevars and their associated Genbank accession numbers. UDL = Unassigned Dickeya Lineage. (XLS) [file pone.0035738.s003.xls]

## Sheet: Blad1
Table S3. Dickeya fliC sequevars and their associated GenBank accession numbers.
strain or isolate	biological origin	fliC classification	sequevar	GenBank accession
LMG 2485T	Dianthus caryophyllus	D. dianthicola	1	JN617628
PRI 2222	Solanum tuberosum	'D. solani'	2	JN617630
CFBP 3855	Saintpaulia ionantha	D. dadantii	3	JN617640
LMG 25991T	Pelargonium capitatum	D. dadantii	3	JN617642
LMG 2533	Zea mays	D. zeae P1	4	JN617643
LMG 2539	Zea mays	D. zeae P2	5	JN617647
LMG 2497	Zea mays	D. zeae detached lineage	6	JN617650
LMG 2804T	Chrysanthemum morifolium	D. chrysanthemi	7	JN617659
LMG 2474	Daucus carota var. sativus	D. chrysanthemi	8	JN617655
NCPPB 1861	Partenium argentatum	D. chrysanthemi (parthenii lineage)	9	JN617656
NCPPB 3533	Solanum tuberosum	D. chrysanthemi (parthenii lineage)	10	JN617652
LMG 2918	Phalaenopsis sp.	UDL-1	11	JN617631
PD 487	Philodendron erubescens cv. Emerald King	UDL-2	12	JN617634
PD 3786	Oncidium sp.	UDL-3	13	JN617637
GBBC 323	Aglaonema sp.	UDL-3	14	JN617633
PD 813	Phalaenopsis sp.	UDL-4	15	JN617638
GBBC 1058	Zea mays	D. zeae P2	16	JN617644
PD 1464	Freesia cv. Oberon	UDL-5	17	JN617649
GBBC 2007	Lactuca sativa	UDL-6	18	JN617651
UDL = unassigned Dickeya lineage
