# Supplementary material for: Sequence Diversity in the Dickeya fliC Gene: Phylogeny of the Dickeya Genus and TaqMan® PCR for 'D. solani', New Biovar 3 Variant on Potato in Europe
Source: PLoS One. 2012 May 3;7(5):e35738. doi: 10.1371/journal.pone.0035738 (PMC3343043; doi:10.1371/journal.pone.0035738)
Supplement: Table S4 — Diagnostic analysis of samples of seed potato plants showing wilting, blackleg or tuber maceration symptoms. 1Ct value 2The isolates attributed to D. dianthicola were identified by sequencing of the fliC amplicon [37]. (XLS) [file pone.0035738.s004.xls]

## Sheet: Alle stammen en isolaten
code	isolate or strain designation	equivalent strain designation					biological origin	geographical origin	biovar	genomic species	genomic species	fliC qPCR	Ct value	status	opmerking	code
		GBBC	PRI	LMG	CFBP	NCPPB				recA/dnaX	fliC
D01	GBBC 1021	1522					potato	Belgium			solani	1		OK		D01
D02	GBBC 1030	1538					potato	Belgium			dianthicola	0		OK		D02
D03	PD 814 = PD 813						Phalaenopsis	The Netherlands	3	afzonderlijke cluster	DUC tussen dadantii/zeae	0		OK	enige stam in cluster	D03
D04	PD 682						Cichorium	The Netherlands	5?		dianthicola	0		OK		D04
D05	PD 551						Kalanchoe	The Netherlands	7	dianthicola	dianthicola	0		OK		D05
D06	GBBC 1016	1517					potato	Belgium			dianthicola	0		OK		D06
D07	PD 4073						potato	Italy			solani	1		OK		D07
D08	GBBC 323						Ludisia	Belgium			dadantii, cluster 1	0		OK		D08
D09	GBBC 1058	1503					corn	Belgium			zeae, cluster 1	0		OK		D09
D10	GBBC 1012	2040		25615			potato	Belgium			solani	1		OK		D10
D11	GBBC 489	2039		25864			potato	Belgium			dianthicola	0		OK		D11
D12	GBBC 487						potato	Belgium			dianthicola	0		OK		D12
D13	GBBC 491						potato	Belgium			dianthicola	0		OK		D13
D14	GBBC 500						potato	Belgium			solani	1		OK		D14
D15	GBBC 1641						potato	Belgium			solani	1		OK		D15
D16	PRI 2131T			2505T	2052T	2538T	corn	USA	3	zeae	zeae, cluster 2	0		OK		D16
D17	PRI 2118T			2804T	2048T	402T	chrysanthemum	USA	5	chrysanthemi bv. chrysanthemi	chrysanthemi bv. chrysanthemi	0		OK		D17
D18	PRI 2114T			2485T	1200T	453T	carnation	UK	1	dianthicola	dianthicola	0		OK		D18
D19	PRI 3332					3537	potato	Peru	3	dadantii	dadantii	0		OK		D19
D20	PRI 3329					3531	potato	Australia	3	zeae	zeae, cluster 1	0		OK		D20
D21																D21
D22	GBBC 2007			24426			lettuce	Belgium			DUC tussen zeae/chrysanthemi	0		OK	enige stam in cluster	D22
D23	GBBC 1040	1570					potato	Belgium			dianthicola	0		OK		D23
D24	PRI 2119				3703		sunflower	France	5	chrysanthemi bv. chrysanthemi	chrysanthemi bv. chrysanthemi	0		OK		D24
D25	PRI 2124				1360		Dieffenbachia	France	2	dieffenbachiae	dieffenbachiae	0		OK		D25
D26	PRI 1259						potato	Germany	2	dieffenbachiae	dieffenbachiae	0		OK		D26
D27	GBBC 1045	1578					potato	Belgium			solani	1		OK		D27
D28	LMG 2534				4177	2477	Musa paradisiaca	Jamaica		dadantii	dadantii, cluster 2	x				D28
D29	LMG 2488				1244	1956	Dahlia	The Netherlands		dianthicola	nt	nt		OK		D29
D30	GBBC 322						potato	Belgium			dianthicola	0		OK		D30
D31	GBBC 353						Dieffenbachia	Belgium			dieffenbachiae	x				D31
D32	GBBC 352						Aglaonema	Belgium			Pectobacterium carotovorum	x				D32
D33	PD 852					3193	Brassica chinensis	Malaysia	3	dadantii	zeae, cluster 1	0		OK		D33
D34	LMG 2918						Phalaenopsis	Germany			DUC tussen solani/dadantii	0		OK	enige stam in cluster	D34
D35	PRI 2019			25990			hyacinth	The Netherlands	3	solani	solani	1		OK		D35
D36	PRI 2222			25993			potato	The Netherlands	3	solani	solani	1		OK		D36
D37	PRI 2132			2533	4176	2339	chrysanthemum	UK	3	zeae	zeae, cluster 2	0		OK		D37
D38	PRI 3330					3533	potato	USA		chrysanthemi	chrysanthemi bv. parthenii	0		OK		D38
D39	PD4001						potato	The Netherlands			nt	nt		OK		D39
D40	ECH3937				3855		Saintpaulia	France	3	dadantii	dadantii, cluster 2	0		OK		D40
D41	PRI 3328					3530	potato	UK	7	dianthicola	dianthicola	0		OK		D41
D42	PRI 980						potato	The Netherlands	7	dianthicola	dianthicola	0		OK		D42
D43	LMG 2474						carrot	USA	5		chrysanthemi bv. chrysanthemi	0		OK		D43
D44	PRI 2187						potato	Israel	3	DUC-1 / solani	solani	1		OK		D44
D45	PRI 3294						potato	Finland	3	DUC-1 / solani	solani	1		OK		D45
D46	PRI 2276						potato	Poland	3	DUC-1 / solani	solani	1		OK		D46
D47	PRI 2120T			25991T	1269T	898T	Pelargonium	Comoro islands	3	dadantii	dadantii, cluster 2	0		OK		D47
D48	LMG 2475				1238	1157	Dieffenbachia	USA		dieffenbachiae	dieffenbachiae	0		OK		D48
D49	LMG 2477				1237	1514	Dieffenbachia	Germany		dieffenbachiae	dieffenbachiae	0		OK		D49
D50	LMG 2479				1345	2308	Dieffenbachia	Italy			dieffenbachiae	0		OK		D50
D51	LMG 2485T		2114T		1200T	453T	carnation	UK		dianthicola	dianthicola	0		OK		D51
D52	LMG 2490				1348	2309	chrysanthemum	Italy		chrysanthemi	chrysanthemi bv. chrysanthemi	0		OK		D52
D53	LMG 2497				1277	1863	corn	USA		zeae	DUC met zeae	0		OK		D53
D54	LMG 2522					2027	chrysanthemum	UK		chrysanthemi	chrysanthemi bv. chrysanthemi	0		OK		D54
D55	LMG 2524					2149	Euphorbia	UK		chrysanthemi	chrysanthemi bv. chrysanthemi	0		OK		D55
D56	LMG 2533		2132		4176	2339	chrysanthemum	UK		zeae	zeae, cluster 2	0		OK		D56
D57	LMG 2539				1447	2546	corn	India			zeae, cluster 2	0		OK		D57
D58	LMG 25729		2115		1276	1385	Dahlia	Romania		dianthicola	dianthicola	0		OK		D58
D59	LMG 25730		3334		1888	3344	potato	France	7	dianthicola	dianthicola	0		OK		D59
D60	LMG 25731		2116/3335		2015	3345	potato	France	7	dianthicola	dianthicola	0		OK		D60
D61	PRI 3228						potato	Israel	3	DUC-1 / solani	nt	nt		OK		D61
D62	PRI 2115			25729	1276		Dahlia	Romania	7	dianthicola	dianthicola	0		OK		D62
D63	PRI 2116		3335	25731	2015	3345	potato	France	7	dianthicola	dianthicola	0		OK		D63
D64	PRI 2117				1236	1861	Parthenium	USA	6	chrysanthemi bv. parthenii	chrysanthemi bv. parthenii	0		OK		D64
D65	PRI 2121			2531	1278	1121	pineapple	Malaysia	3	dadantii	zeae, cluster 1	0		OK	LMG 2531 testen	D65
D66	PRI 2122				3697		Ipomoea batatas	Cuba	3	dadantii	dadantii, cluster 2	0		OK		D66
D67	PRI 2125T			25992T	2051T	2976T	Dieffenbachia	USA	2	dieffenbachiae	dieffenbachiae	0		OK		D67
D68	PRI 2126				3694		tomato	Cuba	2	dieffenbachiae	dadantii, cluster 2	0		OK		D68
D69																D69
D70	PRI 2128				3699		corn	Cuba	4	paradisiaca	paradisaca	0		OK		D70
D71	PRI 2133				6466		pineapple	Martinique	3	zeae	zeae, cluster 2	0		OK		D71
D72	GBBC 1047	1580					potato	Belgium			solani	1		OK		D72
D73	PRI 3295						potato	Finland	3	DUC-1 / solani	solani	1		OK		D73
D74	PRI 3296						potato	Israel	3	DUC-1 / solani	solani	1		OK		D74
D75	PRI 3327					3528	potato	UK	7	dianthicola	dianthicola	0		OK		D75
D76																D76
D77																D77
D78	PRI 3336						potato	France	3	solani	solani	1		OK		D78
D79	PRI 3337						potato	France	3	solani	solani	1		OK		D79
D80	LMG 2542T		2129T		4178	2511T	Musa paradisiaca	Colombia		paradisiaca	paradisiaca	0		OK		D80
D81	LMG 2543					2512	Musa paradisiaca	Colombia		paradisiaca	paradisiaca	0		OK		D81
D82	LMG 2544					2513	Musa paradisiaca	Colombia		paradisiaca	paradisiaca	0		OK		D82
D83	LMG 6250pvrs		2127		3477		Musa paradisiaca	Colombia		paradisiaca	paradisiaca	0		OK		D83
D84	CFBP 2593					3536	potato	Peru		dadantii					ontvangen van CFBP	D84
D85	LMG 2386T				1526T	549T	potato	UK	Pectobacterium atrosepticum		Pectobacterium atrosepticum	0		OK		D85
D86	GBBC 428						paprika	Belgium	Pectobacterium carotovorum		Pectobacterium carotovorum	0		OK		D86
D87	GBBC 1357	1500					potato	Cyprus	Pectobacterium carotovorum			0		OK		D87
D88	GBBC 1356	1504					Brassica oleracea convar. capitata var. Rubra	Belgium	Pectobacterium carotovorum		Pectobacterium carotovorum	0		OK		D88
D89	GBBC 1358	1510					potato	Belgium	Pectobacterium carotovorum			0		OK		D89
D90	GBBC 1359	1511					potato	Belgium	Pectobacterium carotovorum			0		OK		D90
D91	CFBP 6617T			21371T			potato	Brazil	Pectobacterium carotovorum ssp. brasiliensis						ontvangen van CFBP	D91
D92	LMG 2404T				2046T	312T	potato	Denmark	Pectobacterium carotovorum ssp. carotovorum						aan te vragen LMG	D92
D93	CFBP 5388						potato	Algeria	Pectobacterium carotovorum ssp. odoriferum						ontvangen van CFBP	D93
D94	LMG 2398				3291	1449	potato	Romania	Pectobacterium betavasculorum						aan te vragen LMG	D94
D95	LMG 8444T				3304T	3701T	Eutrema wasabi	Japan	Pectobacterium wasabiae						aan te vragen LMG	D95
D96	CFBP 2268						potato	Australia							ontvangen van CFBP	D96
D97	CFBP 2711						potato	Australia							ontvangen van CFBP	D97
D98	CFBP 2274						potato	Australia							ontvangen van CFBP	D98
D99	CFBP 7085						potato	Spain							ontvangen van CFBP	D99
D100	CFBP 7086						potato	Spain							ontvangen van CFBP	D100
D101	ECA 1371						potato	The Netherlands		Pectobacterium atrosepticum	nt					D101
D102	ECA 1602						potato	The Netherlands		Pectobacterium atrosepticum	nt					D102
D103	PCC 139						potato	The Netherlands		Pectobacterium carotovorum	nt					D103
D104	PCC 163						potato	The Netherlands		Pectobacterium carotovorum	nt					D104
D105	PD 4338						Narcis cv Golden bells	The Netherlands	6?	dadantii	dadantii, cluster 2					D105
D106	PD 487						Philodendron erubescens cv Emerald King	The Netherlands	3	dadantii	dadantii, cluster 1					D106
D107	PD 1934						Saintpaulia cv Lord	The Netherlands	3	dadantii	dadantii, cluster 2					D107
D108	PD 3786						Oncidium	The Netherlands	3	dadantii	dadantii, cluster 1					D108
D109	PD 1680						Euphorbia milii	The Netherlands	3		dadantii, cluster 2					D109
D110	PD 916						Packera sp	The Netherlands	3	dadantii	dadantii, cluster 2					D110
D111	PD 1464						Freesia cv Oberon	The Netherlands	3	zeae	DUC met zeae				cluster met LMG 2497	D111
D112	PD 471						Philodendron erubescens cv Emerald King	The Netherlands	3	dadantii	dadantii, cluster 1					D112
D113	PD 826						Gymnocalcinum mihanovichii cv Red cat	The Netherlands	3	dadantii	nt					D113
D114	PD 1268						Aglaenoma Honduras	The Netherlands	3	dadantii	dadantii, cluster 1					D114
D115	PD 1084						Ctenanthe lubbersii	The Netherlands	3	zeae	zeae, cluster 2					D115
D116	PD 550						Scindapsus pictus	The Netherlands	3	dadantii	dadantii, cluster 1					D116
D117	PD 4330						potato	The Netherlands		solani	not tested					D117
D118	ECH 990						potato	The Netherlands		dianthicola	dianthicola					D118
D119	ECH 982						potato	The Netherlands			dianthicola					D119
D120	ECH 993						potato	The Netherlands			dieffenbachiae					D120
D121	ECH 807						potato	The Netherlands			dianthicola					D121
D122	ECA 1071						potato	The Netherlands			nt					D122
D123	ECA 1066						potato	The Netherlands			nt					D123
D124	LMG 13286						potato	UK		Paenibacillus macerans					aan te vragen LMG	D 124
	nt = not tested
	DUC = Dickeya unidentified cluster

## Sheet: S4 diagnostic samples
Table S4. Diagnostic analysis of seed potato plants showing wilting, blackleg or tuber maceration symptoms
	sample	potato variety	isolated from	PDA morphotype	potato maceration	indigoidin on NGM	pelADE	pelY	fliC qPCR extract1	fliC qPCR culture1	result2
1	ALV/2010/001	Felsina	mother tuber	B	+	+	+	-	18.8	16.5	'D. solani'
2	ALV/2010/009	Bintje	mother tuber	A	+	+	+	-	no Ct	no Ct	D. dianthicola
3	ALV/2010/016	Royal	stem	B	+	+	+	-	21.8	16.8	'D. solani'
4	ALV/2010/019	Anosta	stem	B	+	+	+	-	20.7	17.3	'D. solani'
5	ALV/2010/026	Bintje	mother tuber	A	+	+	+	-	no Ct	no Ct	D. dianthicola
6	ALV/2010/032	Jaerla	stem	C	+	-	-	+	no Ct	no Ct	Pectobacterium sp.
7	ALV/2010/033	Gala	mother tuber	B	+	+	+	-	24.9	16.5	'D. solani'
8	ALV/2010/040	Hermes	stem	C	+	-	-	+	no Ct	no Ct	Pectobacterium sp.
9	ALV/2010/058	Kennebec	stem	A	+	+	+	-	no Ct	no Ct	D. dianthicola
10	ALV/2011/002	Cara	stem	D	+	-	-	+	no Ct	no Ct	Pectobacterium sp.
11	ALV/2011/005	Santé	stem	D	+	-	-	+	no Ct	no Ct	Pectobacterium sp.
12	ALV/2011/006	Désiree	mother tuber	A	+	+	+	-	no Ct	no Ct	D. dianthicola
13	ALV/2011/010	Anosta	stem	C	+	-	-	+	no Ct	no Ct	Pectobacterium sp.
14	ALV/2011/014	Désiree	stem	B	+	+	+	-	18.1	17.8	'D. solani'
15	ALV/2011/015	Alegria	stem	C	+	-	-	+	no Ct	no Ct	Pectobacterium sp.
16	ALV/2011/018	Kennebec	stem	B	+	+	+	-	22.5	18.1	'D. solani'
17	ALV/2011/028	Spunta	stem	B	+	+	+	-	22.4	16.9	'D. solani'
18	ALV/2011/029	Mona Lisa	stem	D	+	-	-	+	no Ct	no Ct	Pectobacterium sp.
19	ALV/2011/030	Bintje	stem	B	+	+	+	-	28.1	18.5	'D. solani'
20	ALV/2011/031	Première	stem	D	+	-	-	+	no Ct	no Ct	Pectobacterium sp.
21	ALV/2011/034	Cleopatra	stem	D	+	-	-	+	no Ct	no Ct	Pectobacterium sp.
22	ALV/2011/036	Première	stem	B	+	+	+	-	25.5	18.4	'D. solani'
23	ALV/2011/037	Spunta	stem	B	+	+	+	-	25.1	17.8	'D. solani'
24	ALV/2011/038	Kennebec	stem	A	+	+	+	-	no Ct	no Ct	D. dianthicola
25	ALV/2011/047	Désiree	stem	A	+	+	+	-	no Ct	no Ct	D. dianthicola
26	ALV/2011/049	Paramount	stem	B	+	+	+	-	21.2	16.2	'D. solani'
27	ALV/2011/050	Casablanca	stem	C	+	-	-	+	no Ct	no Ct	Pectobacterium sp.
28	ALV/2011/053	Désiree	stem	B	+	+	+	-	19.5	16.5	'D. solani'
29	ALV/2011/054	Shepody	stem	A	+	+	+	-	no Ct	no Ct	D. dianthicola
30	ALV/2011/056	Bintje	stem	D	+	-	-	+	no Ct	no Ct	Pectobacterium sp.
1	Ct value
2	The isolates of D. dianthicola were identified by sequencing of the fliC PCR amplicon [37].
